# Supplementary material for: Prevalence, Etiology, and Risk Factors of Mastitis in Dairy Cattle in Embu and Kajiado Counties, Kenya
Source: Hindawi journal article supplement (doi:10.1155/2020/8831172), 2020-08-04
Supplement: f1 [file 8831172.f1.pdf]

# Prevalence, Etiology and Risk Factors of Mastitis in Dairy Cattle in Embu and Kajiado Counties, Kenya

## FARMS SURVEY QUESTIONNAIRE FOR DAIRY FARMERS

To be filled once for each farm

|                                |  |
|--------------------------------|--|
| <b>Demographic information</b> |  |
| Farm no                        |  |
| Name of the respondent         |  |
| Gender                         |  |
| Telephone Number of respondent |  |
| Age                            |  |
| Date of the interview          |  |
| County                         |  |
| Sub –County                    |  |
| Division                       |  |
| Location                       |  |
| Village                        |  |
| GPS coordinates                |  |
| Agro-ecological zone (AEZ)     |  |

### Farm Background

1. Who manages the farm?  

A) Owner      B) Relative      C) Employee
2. What is your level of education?  

A) Informal \_\_ B) Primary\_\_ C) Secondary \_\_\_\_\_ D) University \_\_\_\_\_
3. For how long have you been keeping dairy cattle  

A) <1 year \_\_\_\_\_ b)>1 year and <5 years \_\_\_\_\_ c) >5 year \_\_\_\_\_
4. Production system  

A) Intensive \_\_ B) Semi intensive\_\_\_\_ C) Extensive\_\_\_\_
5. How many dairy cows do you have? \_\_\_\_\_
6. What cattle breed do you keep a) Local \_\_\_\_\_ b) Exotic\_\_\_\_ c) Crosses\_\_\_\_
7. Do you keep records? Yes \_\_\_\_\_ No\_\_\_\_\_
 

If yes specify    a) Production\_\_\_\_ b) Breeding\_\_\_\_ C) others (specify)

8. Any given to the cows' supplements? a) No \_\_\_\_ b) Yes \_\_\_\_
9. Are the cattle housed with a roof? A) No \_\_\_\_ B) Yes \_\_\_\_
10. If housed, what is the nature of the floor where the milking cows lie down? A) Concrete \_\_\_\_ B) Earthen \_\_\_\_
11. Presence of Bedding Yes \_\_\_\_ No \_\_\_\_
12. How often is the floor cleaned?  
A. Daily \_\_\_\_ B) Weekly \_\_\_\_ C) Monthly \_\_\_\_ D) Others (specify) \_\_\_\_

### **Mastitis and control practices**

1. Have you ever experience cases of mastitis in the farm? 1) Yes \_\_ 2) No \_\_\_\_
2. Do you milk mastitic cows last? 1) Yes \_\_\_\_ 2) No \_\_\_\_
3. Is the cow milked using proper technique (observe)? 1) Yes \_\_\_\_ 2) No \_\_\_\_
4. Do you wash hands before milking the cows? 1) Yes \_\_\_\_ 2) No \_\_\_\_
5. a) Do you wash the udder pre-milking? 1) Yes \_\_\_\_ 2) No \_\_\_\_  
  
b) Is the udder dried before milking with clean cloth/towel/paper? 1) Yes \_\_\_\_ 2) No \_\_\_\_  
  
c) Is a different clean drying cloth/towel/paper used for each milking cow? 1) Yes \_\_\_\_ 2) No \_\_\_\_  
  
d) if you have > 1 milking cow, do you wash your hands between milking cows? Yes \_\_\_\_ No \_\_\_\_
6. Do you use a teat dip post milking? 1) Yes \_\_\_\_ 2) No \_\_\_\_
7. Do you practice dry cow therapy? 1) Yes \_\_ 2) No \_\_\_\_
8. Do you cull chronically infected cows? 1) Yes \_\_\_\_ 2) No \_\_\_\_
9. Who treats your animals?  
a) Vet Surgeon      b) Animal Health Assistant      c) Self      d) Others (specify) \_\_\_\_\_
10. Do they perform any test to confirm mastitis?  
a) CMT      b) Alcohol test      c) Culture      d) Other (specify) \_\_\_\_\_
11. For how long did mastitis during the last case take to resolve (in general)?  
a) One week  
  
b) Above one week  
  
c) Never resolved

**Cow characteristics details**

| <b>Cow ID</b> | <b>Breed</b> | <b>Parity</b> | <b>Milk production<br/>per day in L</b> | <b>Stage of lactation<br/>(1-2)Early<br/>(3-6) mid<br/>(&gt;7)late</b> | <b>History of<br/>mastitis(yes/No)</b> | <b>CMT results for<br/>each quarter</b> |
|---------------|--------------|---------------|-----------------------------------------|------------------------------------------------------------------------|----------------------------------------|-----------------------------------------|
| Cow 1         |              |               |                                         |                                                                        |                                        | FR<br>HR<br>FL<br>HL                    |
| Cow 2         |              |               |                                         |                                                                        |                                        | FR<br>HR<br>FL<br>HL                    |
|               |              |               |                                         |                                                                        |                                        |                                         |
